# Supplementary material for: Reduction-triggered red fluorescent probes for dual-color detection of oligonucleotide sequences
Source: Royal Society of Chemistry journal article supplement (doi:10.1039/b817228e), 2008-12-12
Supplement: b817228e.pdf [file b817228e.pdf]

## Supporting Information

### **Reduction-triggered red fluorescent probes for dual-color detection of oligonucleotide sequences**

Kazuhiro Furukawa,<sup>a,c</sup> Hiroshi Abe,<sup>\* a</sup> Jin Wang,<sup>a</sup> Miwako Uda,<sup>a,c</sup> Hiroyuki Koshino,<sup>b</sup>  
Satoshi Tsuneda,<sup>c</sup> Yoshihiro Ito<sup>\*a</sup>

<sup>a</sup>*Nano Medical Engineering Laboratory, Advance Science Institute, RIKEN, 2-1, Hirosawa, Wako-Shi, Saitama, 351-0198, Japan.*

<sup>b</sup>*Molecular Characterization Team Advanced Technology Support Division, Advance Science Institute, RIKEN, 2-1, Hirosawa, Wako-Shi, Saitama, 351-0198 Japan.*

<sup>c</sup>*Department of Life Science and Medical Bio-Science, Waseda University, 2-2 Wakamatsu-cho, Shinjuku-ku, Tokyo 162-8480, Japan.*

Email: h-abe@riken.jp and y-ito@riken.jp

CONTENTS:

|                                                                    |   |
|--------------------------------------------------------------------|---|
| Supporting experimental section                                    | 3 |
| Figure S1. Reverse phase HPLC analysis of the compound 1, 2, and 3 | 4 |
| Figure S2. Partial HMBC correlations in Isomer II                  | 5 |
| Figure S3. HPLC analysis of the DNA-templated reaction mixture     | 6 |
| $^1\text{H}$ -NMR, $^{13}\text{C}$ -NMR, and HMBC                  | 7 |

## Supporting experimental section

**Reverse phase HPLC separation of regioisomers of compound 1.** The separation of regioisomers of compound 1 (5-carboxynaphthorhodamine and 6-carboxynaphthorhodamine) was carried out by reverse phase HPLC (0-80 % acetonitrile/50 mM triethylammonium acetate gradient) using hydrosphere C18 column (250×4.6 mm; YMC Co. Ltd, Japan). Fractions containing same isomer were combined, and the solvent was removed under reduced pressure. The buffer component, triethylammonium acetate, was removed by repeated desalination using C18 column. The position of carboxyl group was determined by analyzing  $^1\text{H}$  NMR,  $^{13}\text{C}$  NMR, and HMBC experiment.

**$^1\text{H}$  and  $^{13}\text{C}$  NMR of 5-carboxynaphthorhodamine (isomer II).**  $^1\text{H}$  NMR (600 MHz,  $\text{CD}_3\text{OD}$ )  $\delta$  6.93 (2H, brs), 6.99 (2H, d,  $J = 9.0$  Hz), 7.09 (2H, brd,  $J = 9.1$  Hz), 7.48 (2H, d,  $J = 9.0$  Hz), 7.61 (1H, d,  $J = 7.5$  Hz), 8.50 (1H, brd,  $J = 7.5$  Hz), 8.58 (2H, d,  $J = 9.1$  Hz), 9.00 (1H, brs)  $^{13}\text{C}$  NMR (150 MHz,  $\text{CD}_3\text{OD}$ )  $\delta$  109.96, 114.67, 118.57, 120.27, 123.87, 127.47, 128.60, 131.38, 133.08, 135.05, 141.89, 155.66, 167.81, 168.01

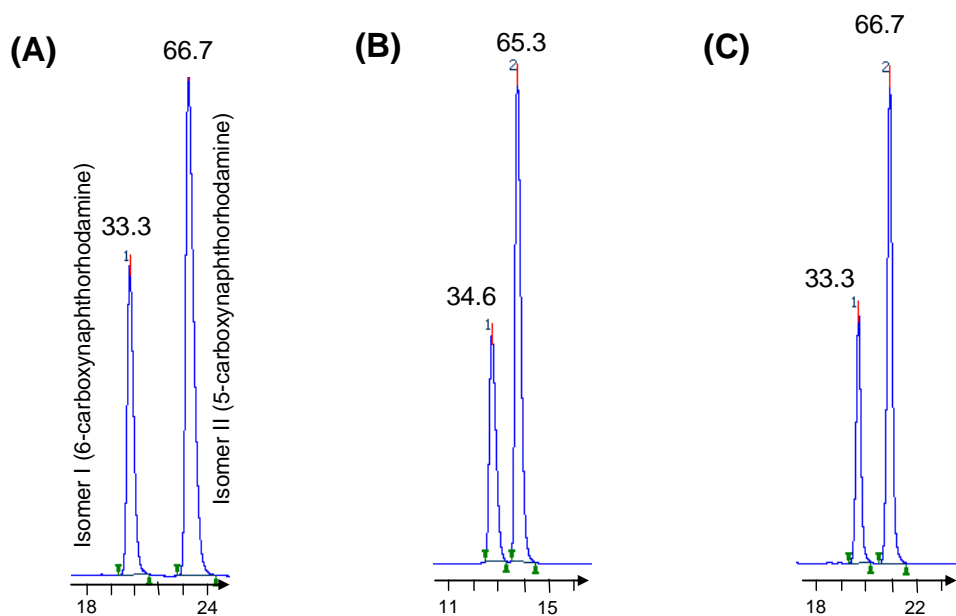

**Figure S1.** Reverse phase HPLC analysis of the compound 1 (A), 2 (B), and 3 (C). The values indicate that percentage of the area. The HPLC conditions are as follows: 30-30 % (A), 80-80 % (B), or 80-100 % (C), 50 mM triethylammonium acetate / acetonitrile gradient using hydrosphere C18 column (250x4.6 mm; YMC Co., Ltd, Japan). HMBC experiment revealed that isomer I was 6-carboxynaphthorhodamine derivatives and isomer II was 5-carboxynaphthorhodamine derivatives.

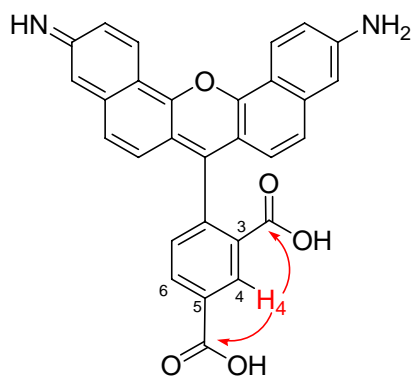

**Figure S2.** Partial HMBC ( $^1\text{H} \rightarrow ^{13}\text{C}$ ) correlations in Isomer II (5-carboxynaphthorhodamine).

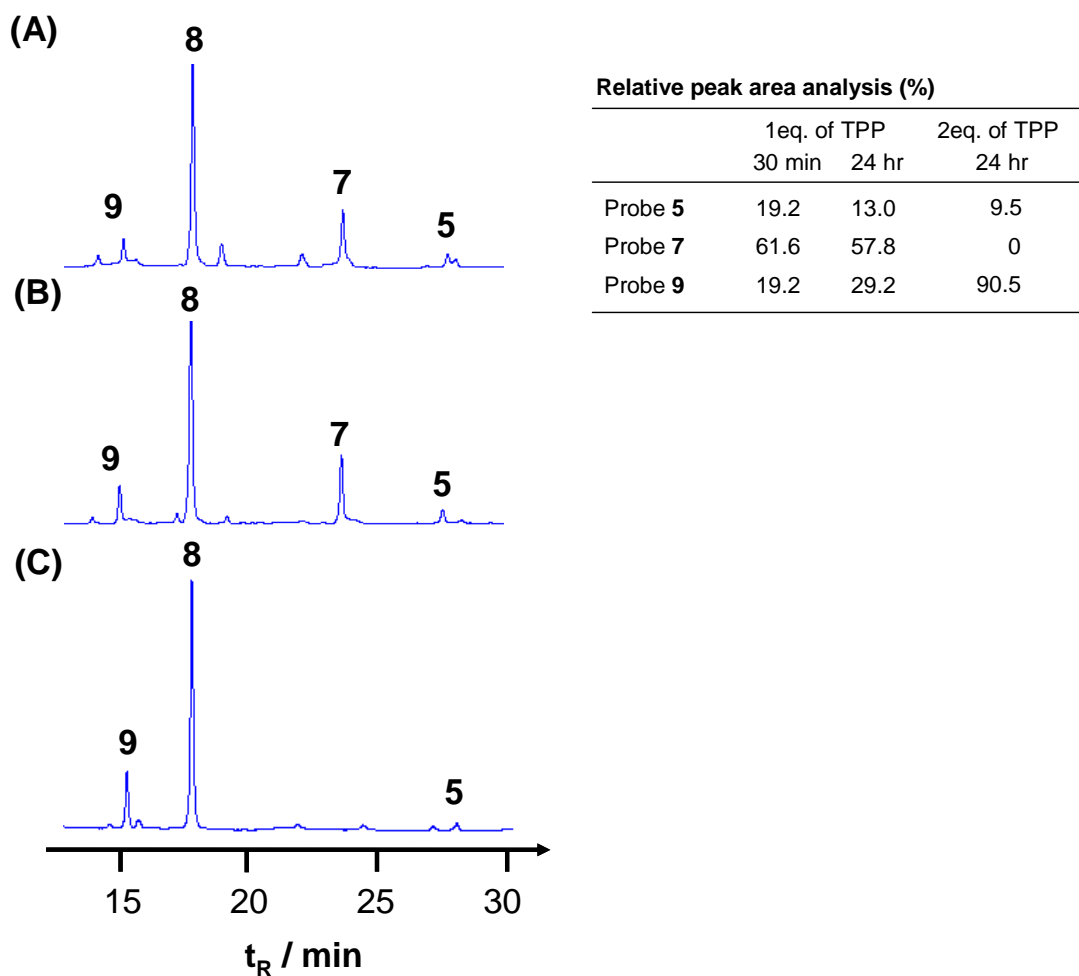

**Figure S3.** HPLC analysis of the DNA-templated reaction mixture. A) 30 min reaction with 1 equivalent of probe **6**, B) 24 hours reaction with 1 equivalent of probe **6**, C) 24 hours reaction with 2 equivalent of probe **6**. Peak 1, probe **9** (reduced probe **5** with diamino group), calculated: 3042.0, observed: 3041.6; Peak 2, probe **8** (oxidized probe **6**), calculated: 3499.5, observed: 3499.7; Peak 3, probe **7** (reduced probe **5** with monoamino group), calculated: 3067.4, observed: 3067.6; Peak 4, probe **5** with bisazide group, calculated: 3093.3, observed: 3093.6. The reaction products were analyzed by reverse-phase HPLC (0-80 % acetonitrile/50 mM triethylammonium acetate gradient) using hydrosphere C18 column (250 × 4.6 mm; YMC Co., Ltd, Japan). Each peak was characterized by ESI-mass spectrometry.

C:\Documents and Settings\共通2\Desktop\フufurukawa NMR\Red\_fluoro\_paper\NaphRh\_1H.a1s

NaphRh\_1H.a1s  
 Tue Feb 20 17:20:13 2007  
 1H  
 NON  
 395.75 MHz  
 124.00 KHz  
 10277.00 Hz  
 32768  
 7917.60 Hz  
 16  
 4.1386 sec  
 2.8610 sec  
 6.30 usec  
 1H  
 22.7 c  
 CD3OD  
 3.30 ppm  
 0.12 Hz  
 14

DFILE  
 COMNT  
 DATIM  
 OBNUC  
 EXMOD  
 OBFRQ  
 OBSET  
 OBFIN  
 POINT  
 FREQU  
 SCANS  
 ACQTM  
 PD  
 PW1  
 IRNUC  
 CTEMP  
 SLVNT  
 EXREF  
 BF  
 RGAIN

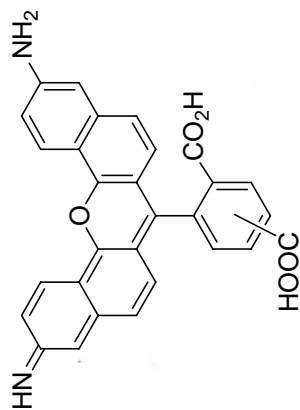

<sup>1</sup>H NMR (CD<sub>3</sub>OD), 400MHz

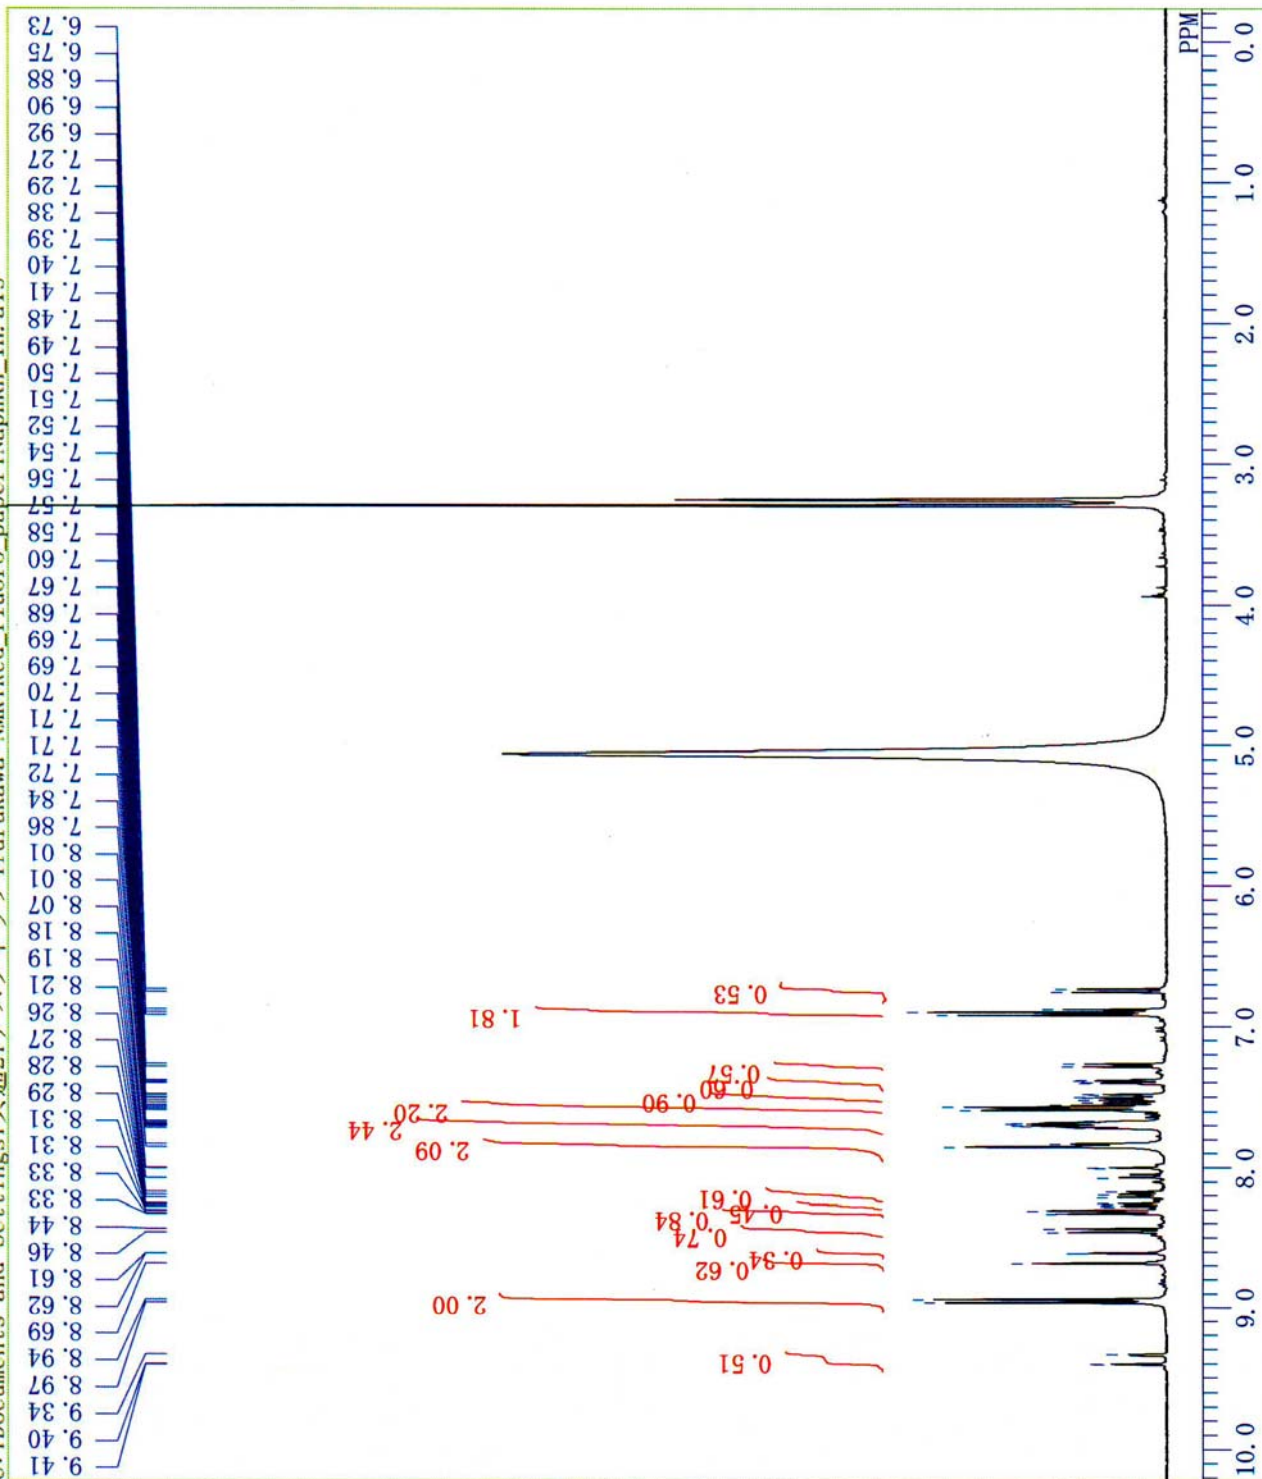

C:\Documents and Settings\共通2\デスクトップ\Yfurukawa NMR\Red fluoro paper\NaphRh\_13C. als

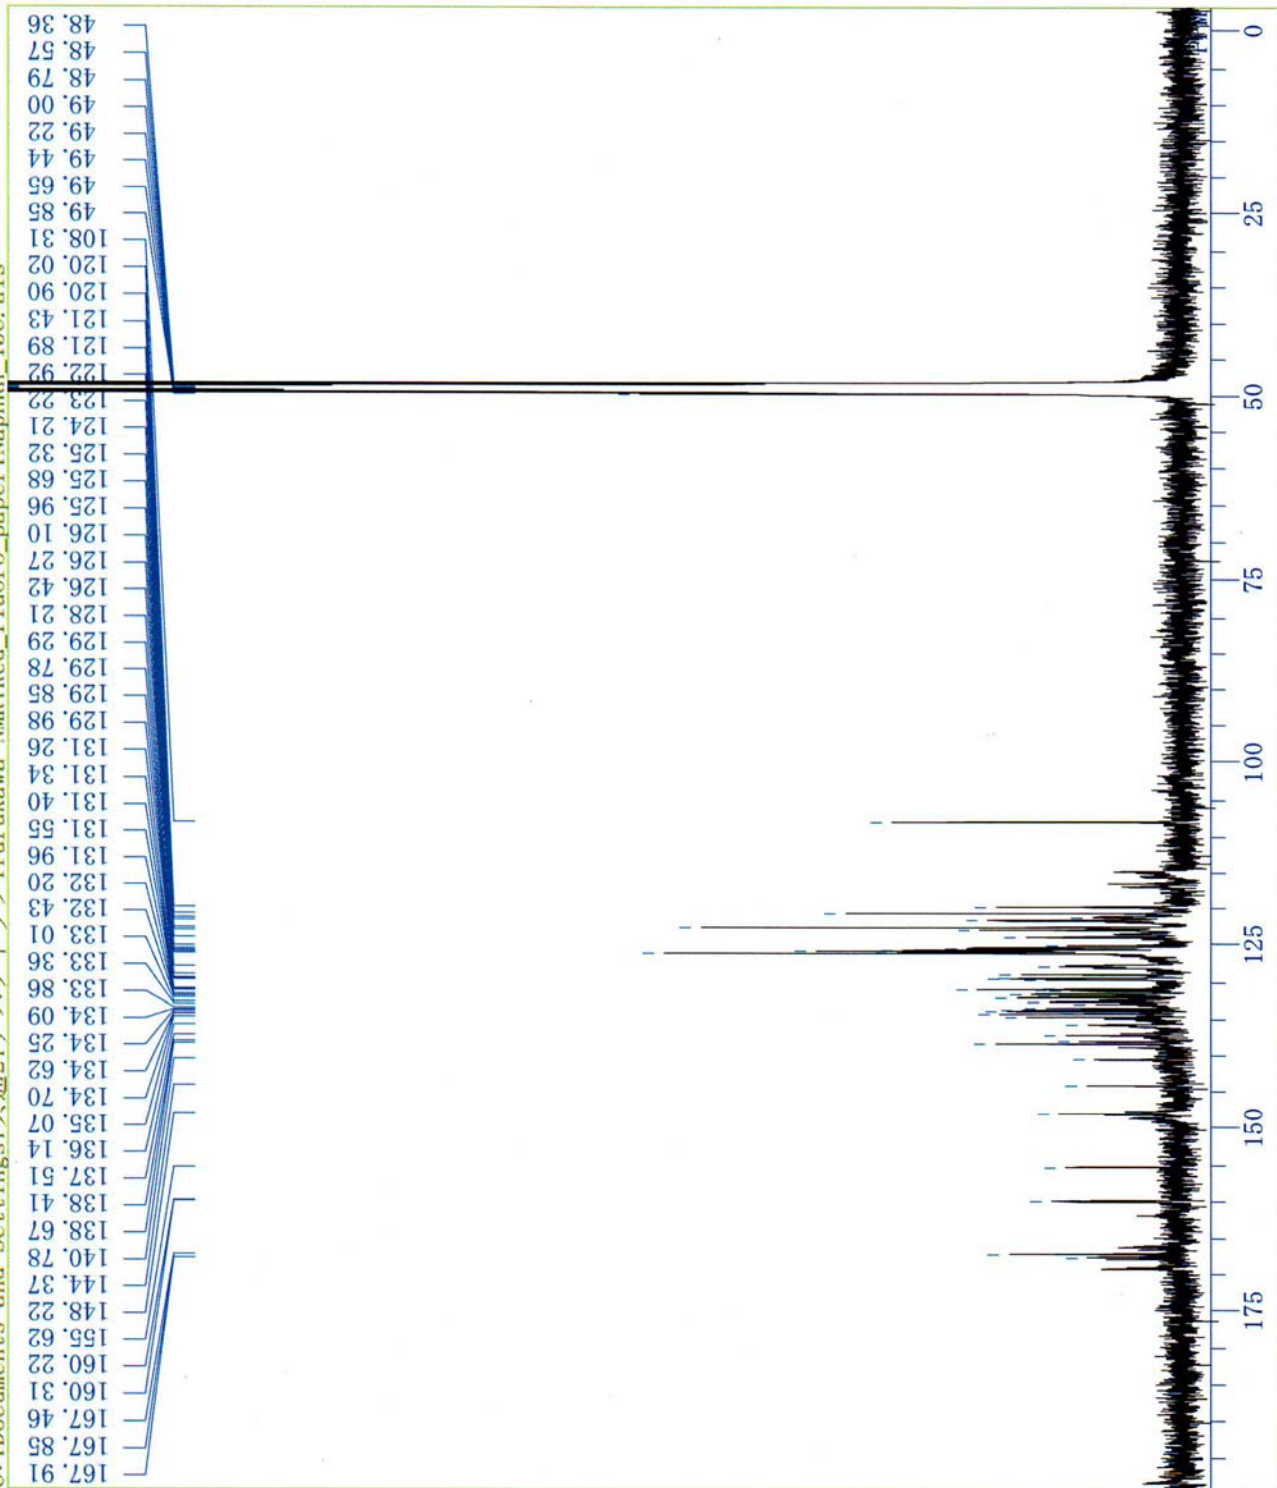

DFILE NaphRh\_13C. als  
COMNT  
DATIM Wed Feb 21 09:09:30 2007  
OBNUC 13C  
EXMOD BCM  
OBFRQ 99.45 MHz  
OBSET 94.00 KHz  
OBFIN 10309.00 Hz  
POINT 32768  
FREQU 26881.70 Hz  
SCANS 13151  
ACQTM 1.2190 sec  
PD 1.7810 sec  
PW1 6.20 usec  
IRNUC 1H  
CTEMP 22.3 c  
SLVNT CD3OD  
EXREF 49.00 ppm  
BF 1.20 Hz  
RGAIN 27

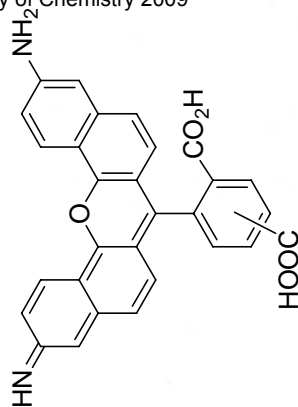



C:\Documents and Settings\共通2\Desktop\Yfukurukawa\_NMR\Red\_fluoro\_paper\NaphRh\_bisaz\_1H.als

NaphRh\_bisaz\_1H.als  
 Thu Apr 17 22:28:41 2008  
 DF FILE  
 COMNT  
 DATIM 1H  
 OBNUC NON  
 EXMOD  
 OBFRQ 300.40 MHz  
 OBSET 130.00 KHz  
 OBFIN 1150.00 Hz  
 POINT 16384  
 FREQU 6006.01 Hz  
 SCANS 32  
 ACQTM 2.7279 sec  
 PD 4.2720 sec  
 PW1 5.50 usec  
 IRNUC 1H  
 CTEMP 22.9 c  
 SLYNT DMSO  
 EXREF 0.00 ppm  
 BF 0.37 Hz  
 RGAIN 18

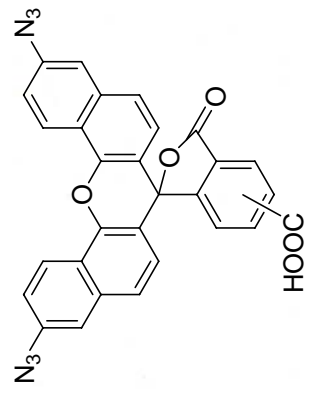

<sup>1</sup>H NMR (DMSO), 300MHz

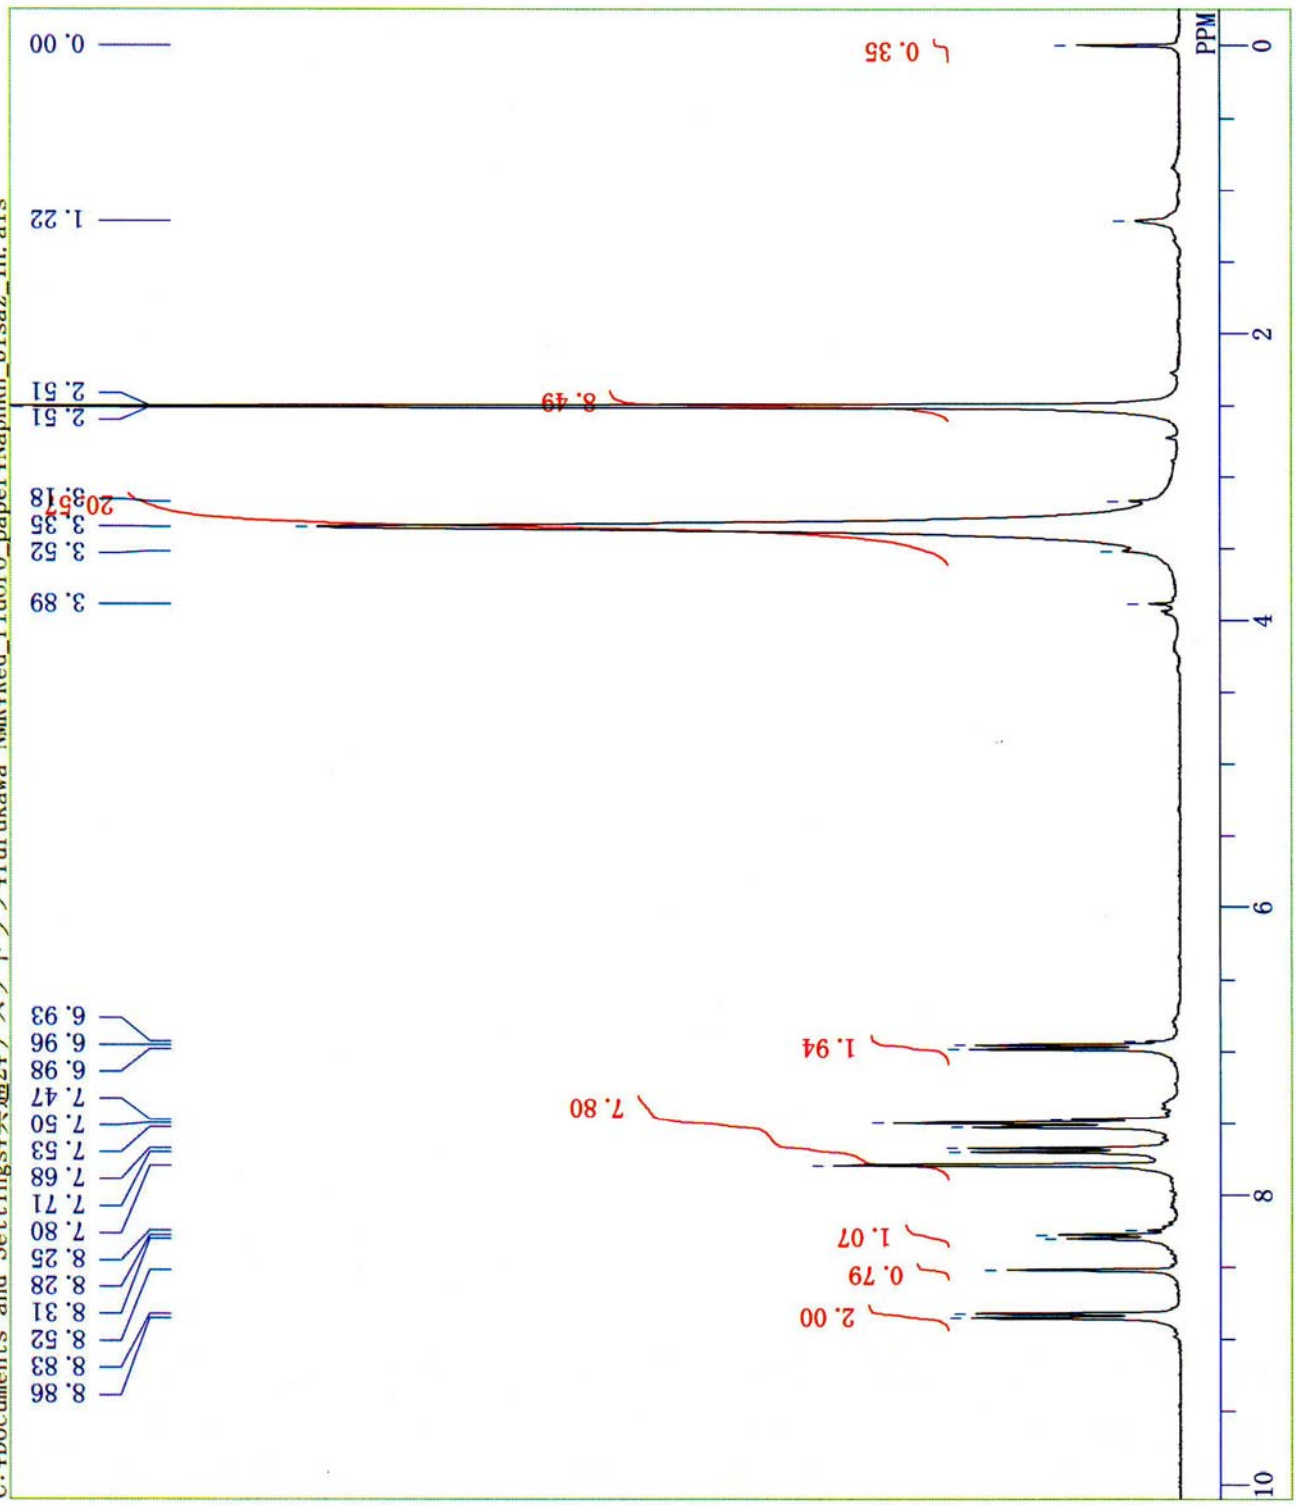

C:\Documents and Settings\Y共通2\デスクトップ\Yfurukawa NMR\Red\_fluoro\_paper\NaphRh\_bisaz\_13C.als

D:\FILE NaphRh\_bisaz\_13C.als  
COMNT  
DATIM Fri Apr 18 09:22:19 2008  
OBNUC 13C  
EXMOD BCM  
OBFRQ 75.45 MHz  
OBSET 124.00 KHz  
OBFIN 1840.00 Hz  
POINT 32768  
FREQU 20356.23 Hz  
SCANS 13031  
ACQTM 1.6097 sec  
PD 1.3900 sec  
PW1 4.20 usec  
IRNUC 1H  
CTEMP 22.5 c  
SLVNT DMSO  
EXREF 39.50 ppm  
BF 0.37 Hz  
RGAIN 23

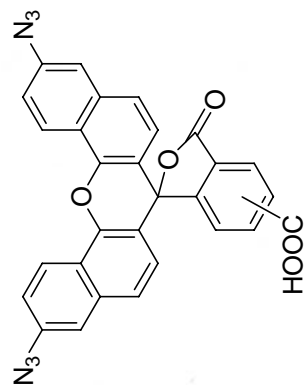

<sup>13</sup>C NMR (DMSO), 75MHz

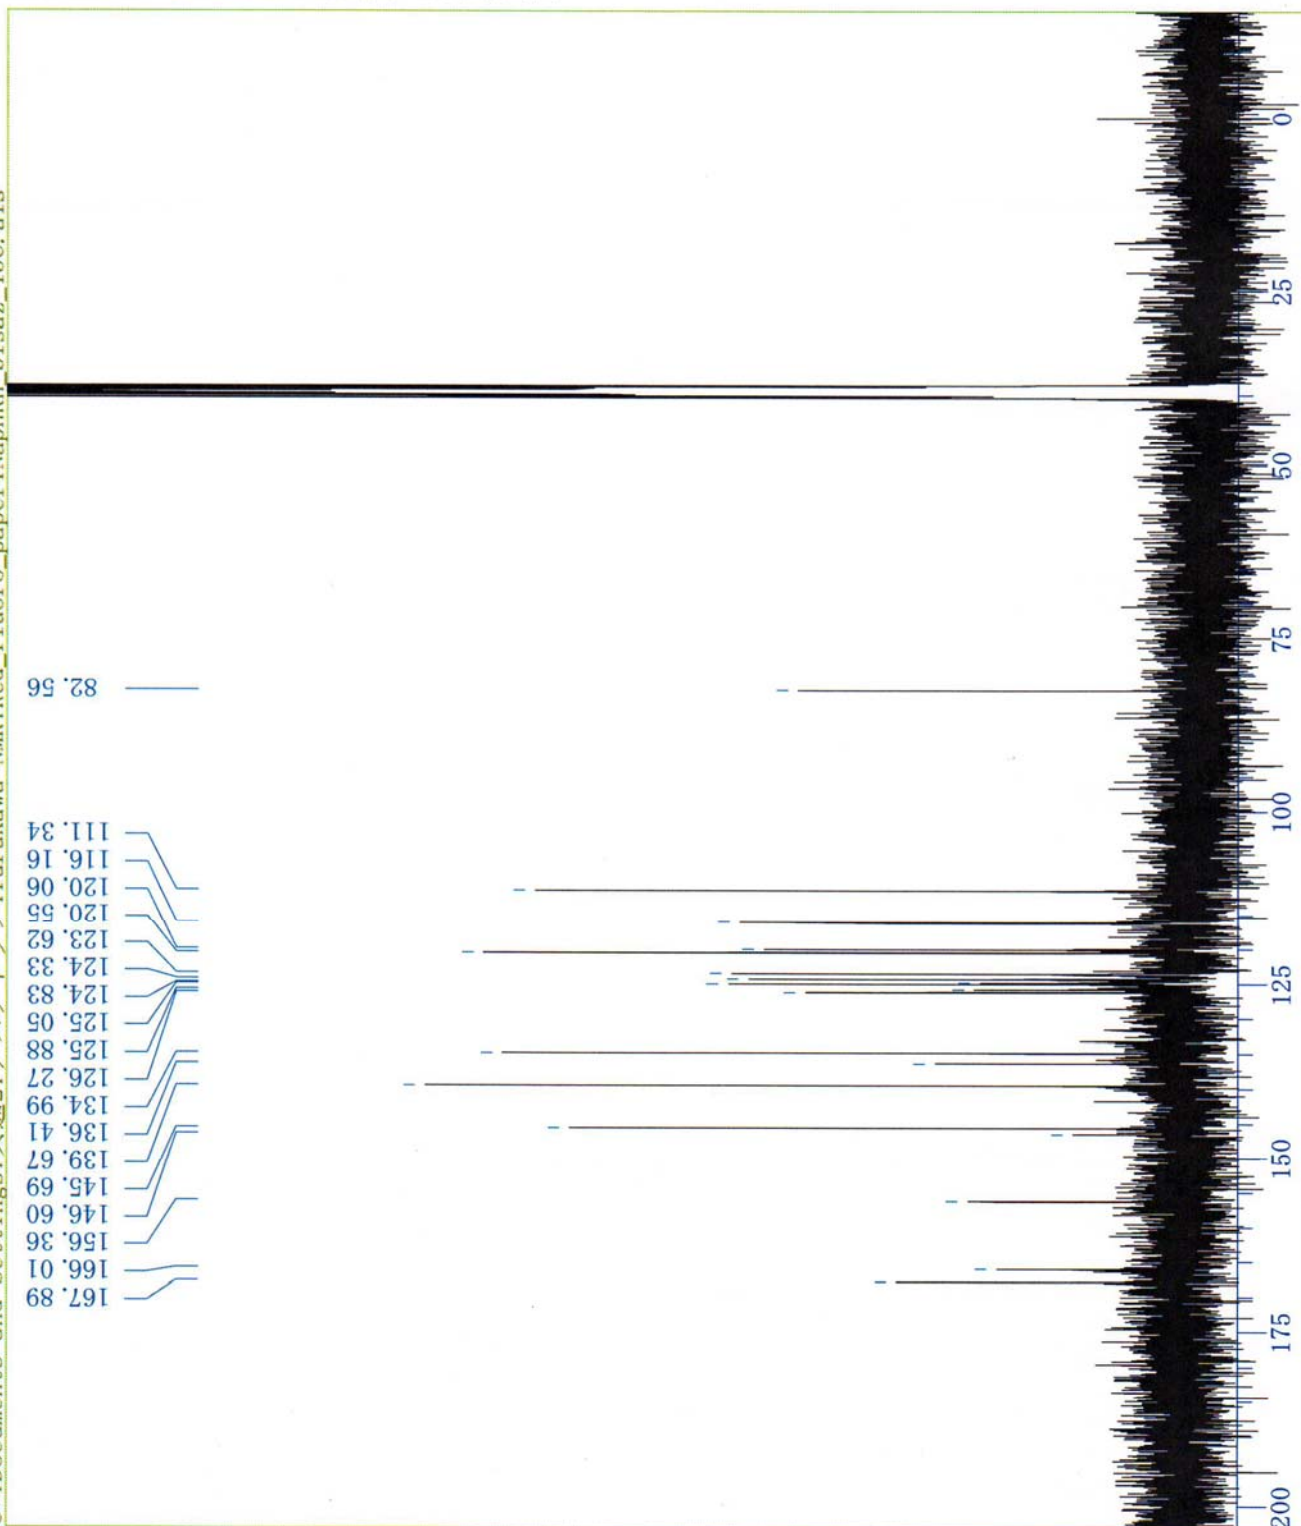

red fluoro di-azide NHS ester

C:\Documents and Settings\共通2\デスクトップ\Yfukurukawa NMR\Red\_fluoro\_paper\NaphRh\_bisaz\_NHSeater\_1H.als

NaphRh\_bisaz\_NHSeater\_1H.als  
 red fluoro di-azide NHS ester  
 Mon Apr 02 21:49:55 2007

DFILE  
 COMNT  
 DATIM  
 OBNUC  
 EXMOD  
 OBFRQ  
 OBSST  
 OBFIN  
 POINT  
 FREQU  
 SCANS  
 ACQTM  
 PD  
 PW1  
 IRNUC  
 CTEMP  
 SLVNT  
 EXREF  
 BF  
 RGAIN

1H  
 NON  
 395.75 MHz  
 124.00 KHz  
 10277.00 Hz  
 32768  
 7917.60 Hz  
 32  
 4.1386 sec  
 2.8610 sec  
 6.30 usec  
 22.3 c  
 0.00 ppm  
 0.22 Hz  
 15  
 1H  
 CDCL3

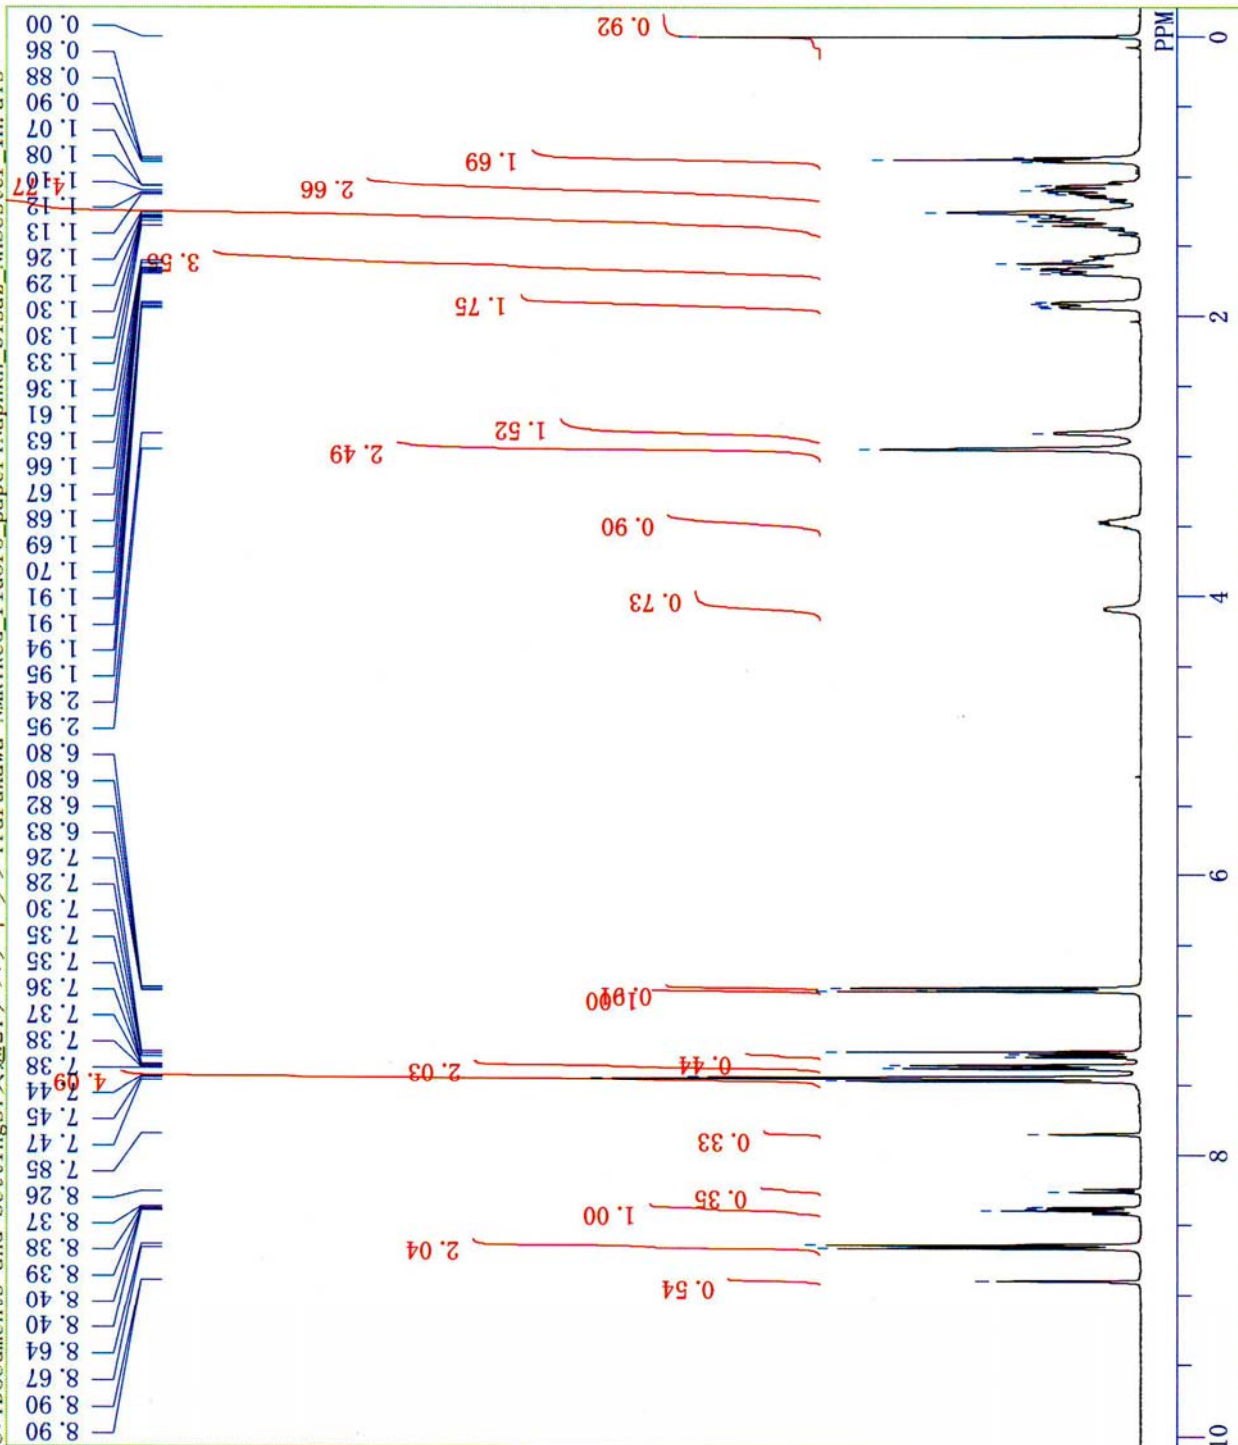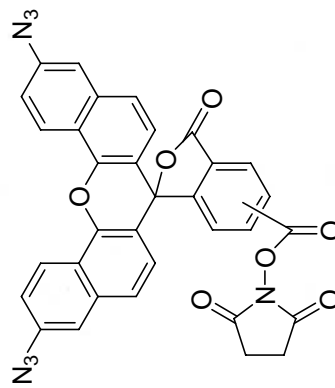

<sup>1</sup>H NMR (CDCl<sub>3</sub>), 400MHz



red fluoro di-azide NHS ester

C:\Documents and Settings\Y共同2\デスクトップ\Yfukurukawa NMR\Red\_fluoro\_paper\NaphRh\_bisaz\_NHSEster\_13C.als

DFILE NaphRh\_bisaz\_NHSEster\_13C.als  
COMT red fluoro di-azide NHS ester  
DATIM Tue Apr 03 08:59:31 2007  
OBNUC 13C  
EXMOD BCM  
OBFRQ 99.45 MHz  
OBSET 94.00 KHz  
OBFIN 10309.00 Hz  
POINT 32768  
FREQU 26881.70 Hz  
SCANS 13275  
ACQTM 1.2190 sec  
PD 1.7810 sec  
PW1 6.20 usec  
IRNUC 1H  
CTEMP 21.6 c  
SLVNT CDCL3  
EXREF 0.00 ppm  
BF 0.22 Hz  
RGAIN 27

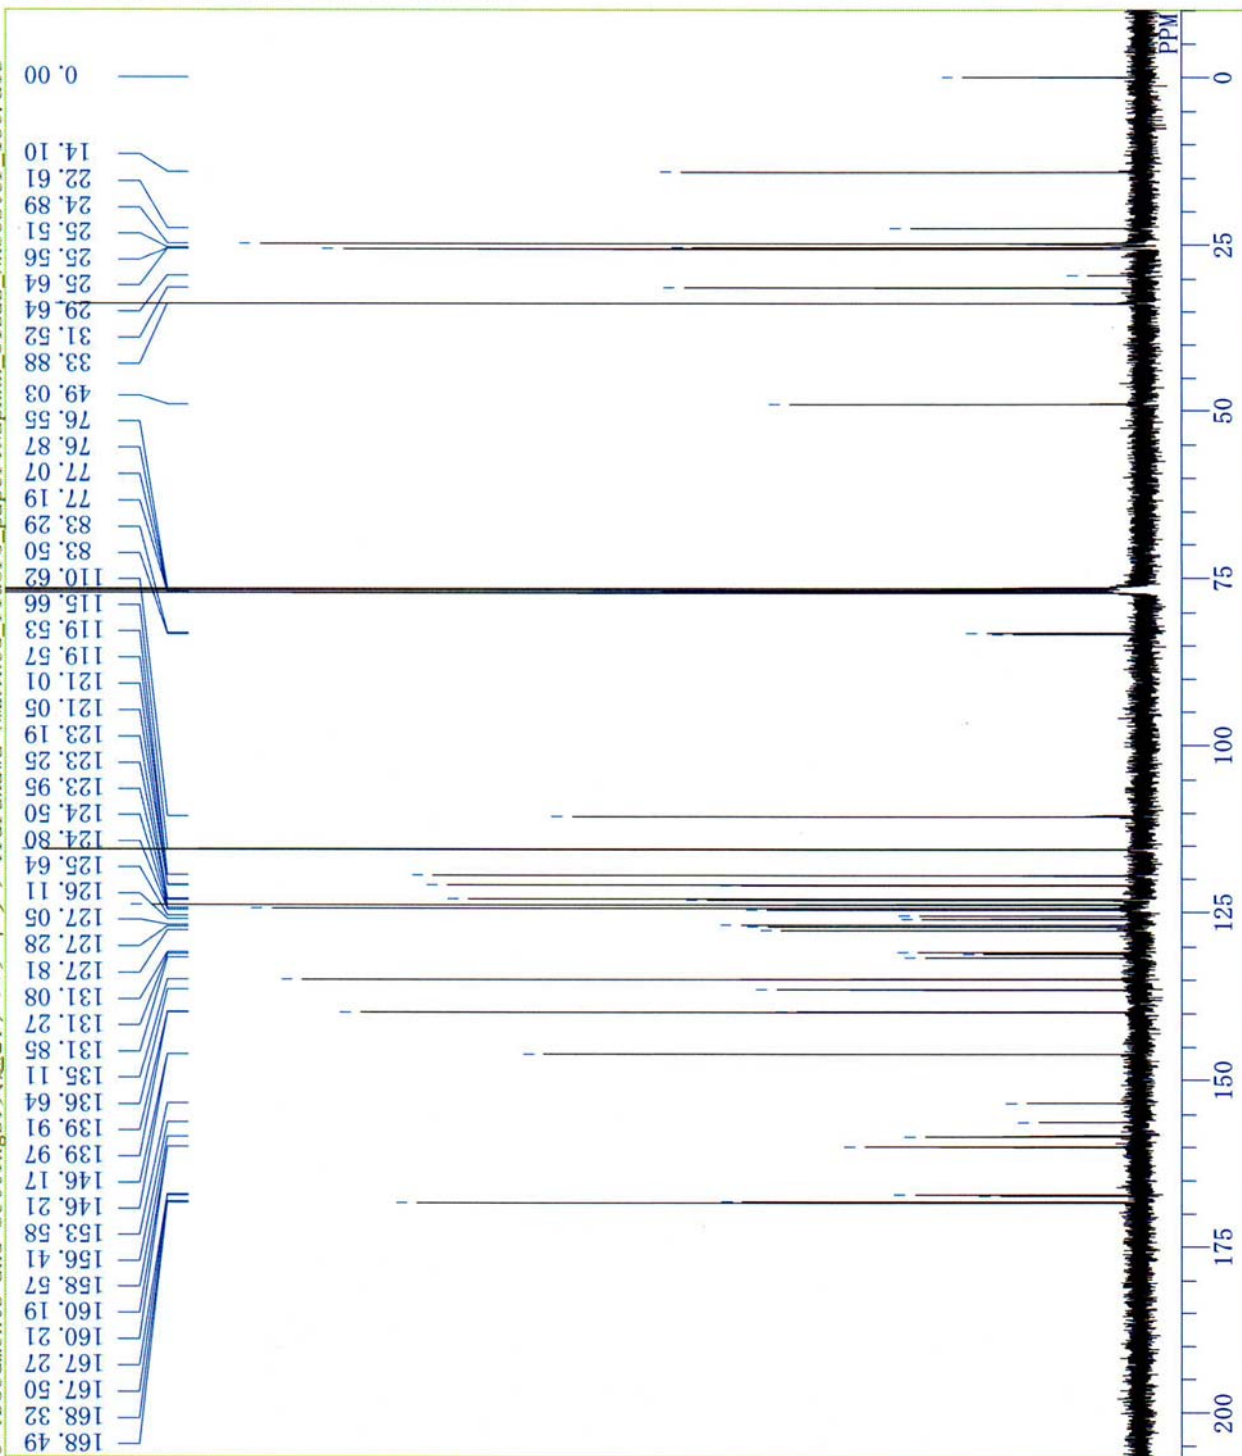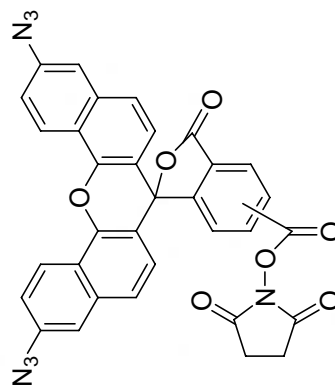

<sup>13</sup>C NMR (CDCl<sub>3</sub>), 100MHz

C:\Documents and Settings\共通2\デスクトップ\Yfurukawa NMR\Red\_fluoro\_paper\NaphRh\_monoaz\_1H. als

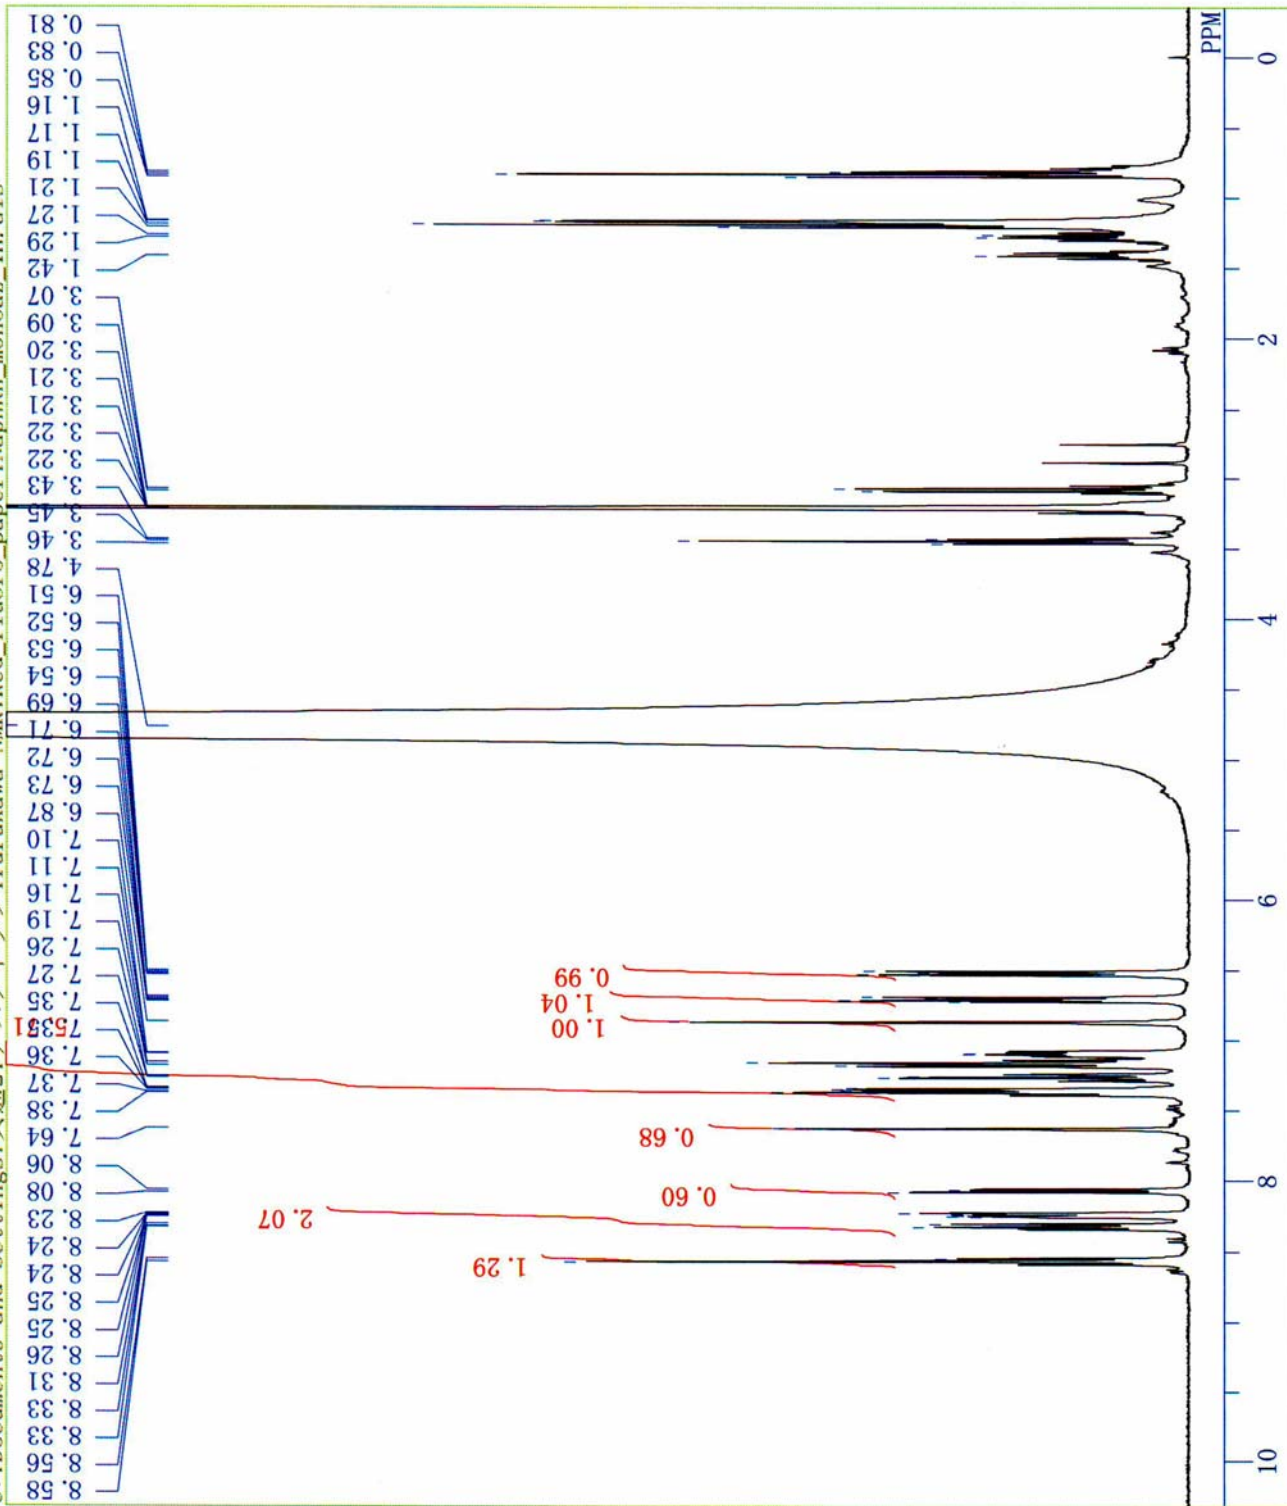

DFILE NaphRh\_monoaz\_1H. als  
 COMNT Sat Jun 28 19:58:26 2008  
 DATIM 1H  
 OBNUC NON  
 EXMOD  
 OBFREQ 395.75 MHz  
 OBSSET 124.00 KHz  
 OBFIN 10277.00 Hz  
 POINT 16384  
 FREQU 7912.96 Hz  
 SCANS 64  
 ACQTM 2.0705 sec  
 PD 4.9290 sec  
 PW1 6.30 usec  
 IRNUC 1H  
 CTEMP 21.5 c  
 SLVNT CD3OD  
 EXREF 0.00 ppm  
 BF 0.24 Hz  
 RGAIN 11

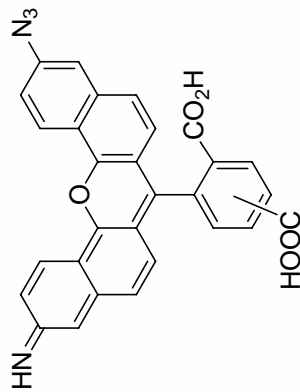

<sup>1</sup>H NMR (CD<sub>3</sub>OD), 400MHz



C:\Documents and Settings\共通2\Desktop\フुरुカワ NMR\Red\_fluoro\_paper\NaphRh\_monoaz\_13C.als

NaphRh\_monoaz\_13C.als  
 Sun Jun 29 10:37:41 2008  
 13C  
 BCM  
 EXMOD  
 OBFRQ 99.45 MHz  
 OBSET 94.00 KHz  
 OBFIN 10309.00 Hz  
 POINT 32768  
 FREQU 26845.64 Hz  
 SCANS 17547  
 ACQTM 1.2206 sec  
 PD 1.7790 sec  
 PW1 6.20 usec  
 IRNUC 1H  
 CTEMP 21.5 c  
 SLVNT CD3OD  
 EXREF 49.00 ppm  
 BF 0.24 Hz  
 RGAIN 27

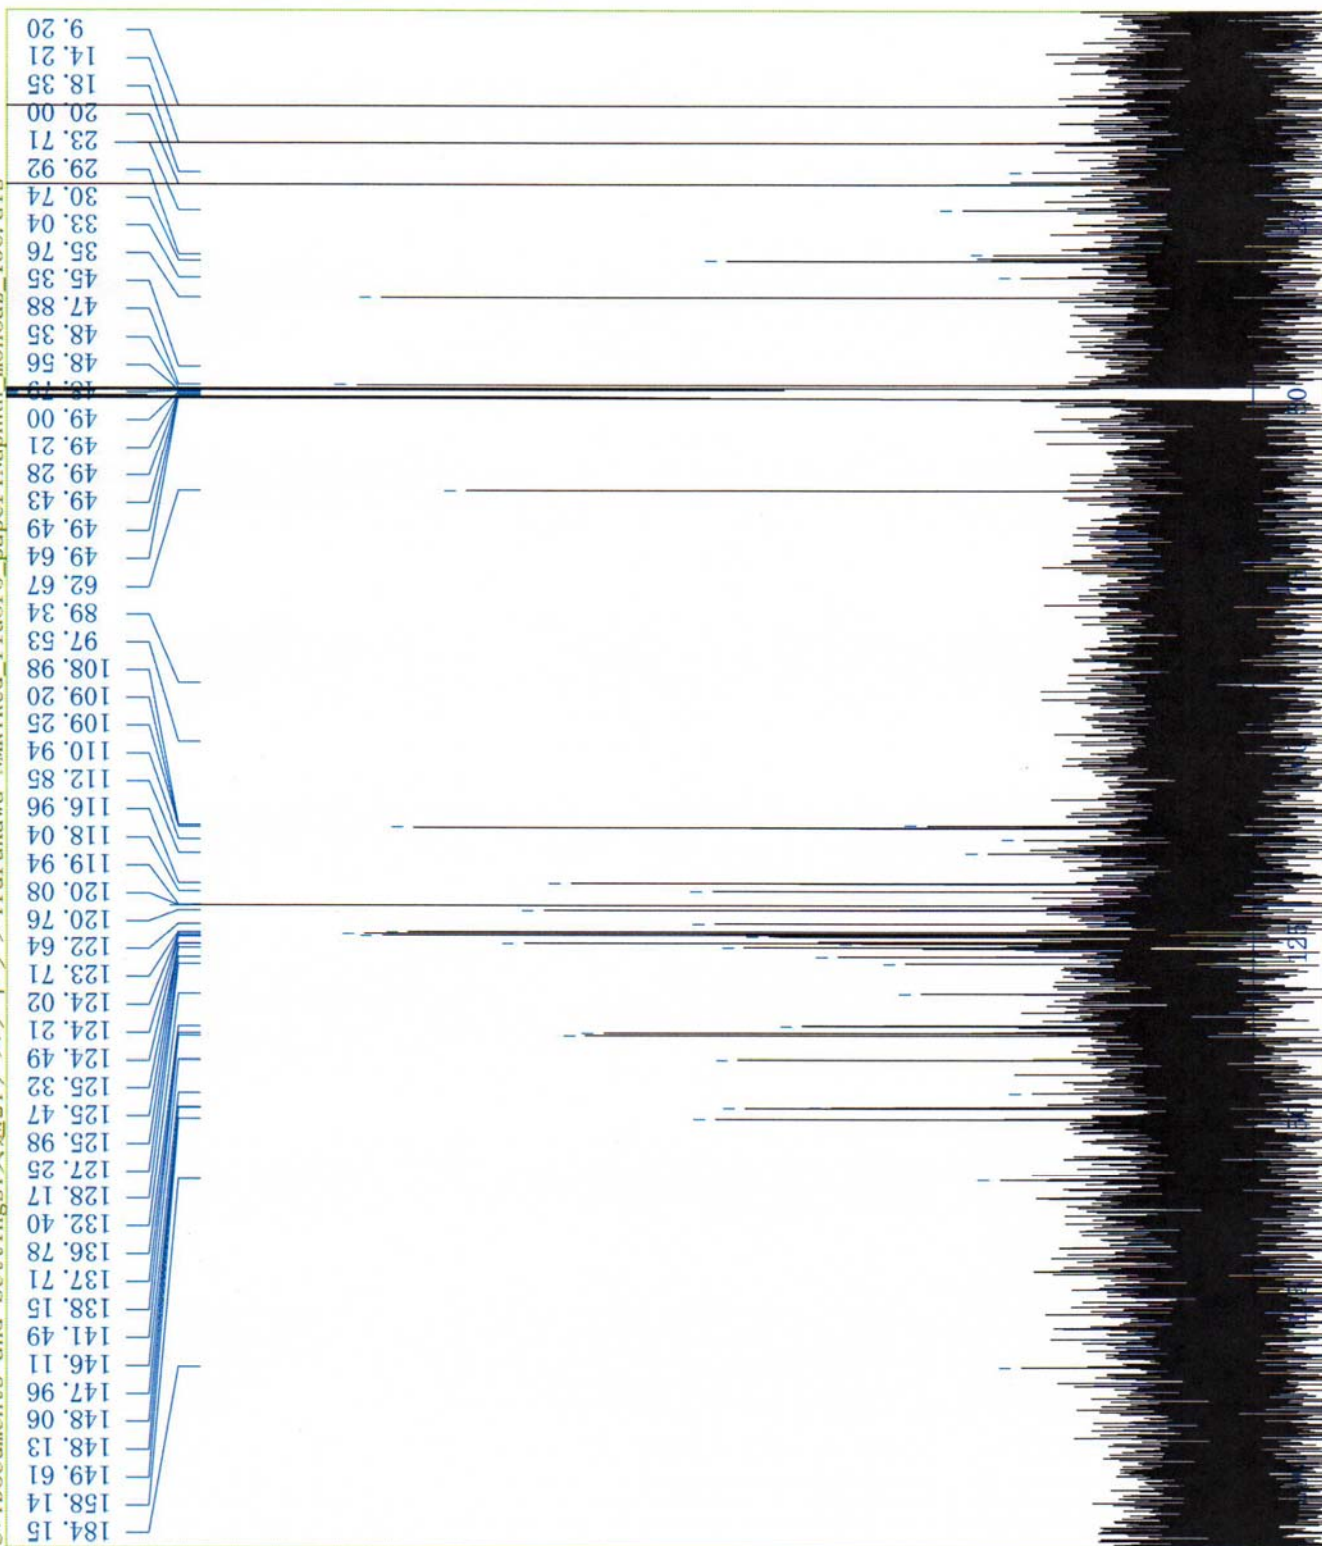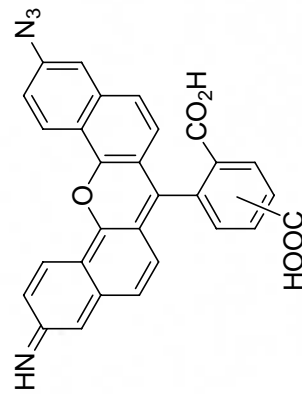

<sup>13</sup>C NMR (CD<sub>3</sub>OD), 100MHz



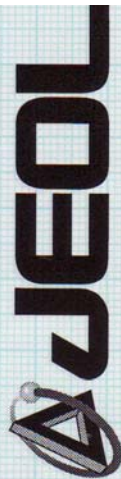

---- PROCESSING PARAMETERS ----

dc\_balance : 0 : FALSE  
 sexp : 0.2 [Hz] : 0.0 [s]  
 trapezoid3 : 0 [%] : 80 [%] : 100 [%]  
 zerofill : 1  
 fft : 1 : TRUE : TRUE  
 machinephase  
 ppm

Derived from: 212-KF167101-1H-single\_pul

Filename = 212-KF167101-1H-singl  
 Author = hkashino  
 Experiment = single\_pulse.ex2  
 Sample\_id = hk  
 Solvent = METHANOL-D3  
 Creation\_time = 25-JUN-2008 17:41:48  
 Revision\_time = 26-JUN-2008 10:49:54  
 Current\_time = 26-JUN-2008 10:50:45  
 Content = KF167101\_cd3od\_th5atf  
 Data\_format = ID COMPLEX  
 Dim\_size = 13107  
 Dim\_title = 1H  
 Dim\_units = [ppm]  
 Dimensions = X  
 Site = ECA600  
 Spectrometer = DELTA2\_NMR  
 Field\_strength = 14.09636928 [T] (600 IM  
 X\_acq\_duration = 1.98443008 [s]  
 X\_domain = 1H  
 X\_freq = 600.1723046 [MHz]  
 X\_offset = 5 [ppm]  
 X\_points = 16384  
 X\_prescans = 1  
 X\_resolution = 0.50392302 [Hz]  
 X\_sweep = 8.25627477 [kHz]  
 Irr\_domain = 1H  
 Irr\_freq = 600.1723046 [MHz]  
 Irr\_offset = 5 [ppm]  
 Tri\_domain = 1H  
 Tri\_freq = 600.1723046 [MHz]  
 Tri\_offset = 5 [ppm]  
 Clipped = FALSE  
 Mod\_return = 1  
 Scans = 16  
 Total\_scans = 16  
 X\_90\_width = 13 [us]  
 X\_acq\_time = 1.98443008 [s]  
 X\_angle = 45 [deg]  
 X\_atn = 3.4 [dB]  
 X\_pulse = 6.5 [us]  
 Irr\_pulse = Off  
 Tri\_mode = Off  
 Dante\_preset = FALSE  
 Initial\_wait = 1 [s]  
 Recvr\_gain = 36  
 Relaxation\_delay = 3 [s]  
 Repetition\_time = 4.98443008 [s]  
 Temp\_get = 25 [dC]

212-KF167101-1H-single\_pulse-3.jdf  
 KF167101\_cd3od\_th5atfg\_temp25\_single\_pulse

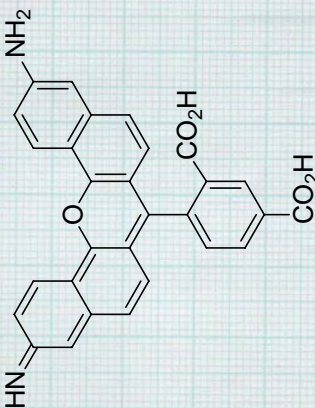

<sup>1</sup>H NMR (CD<sub>3</sub>OD), 600MHz

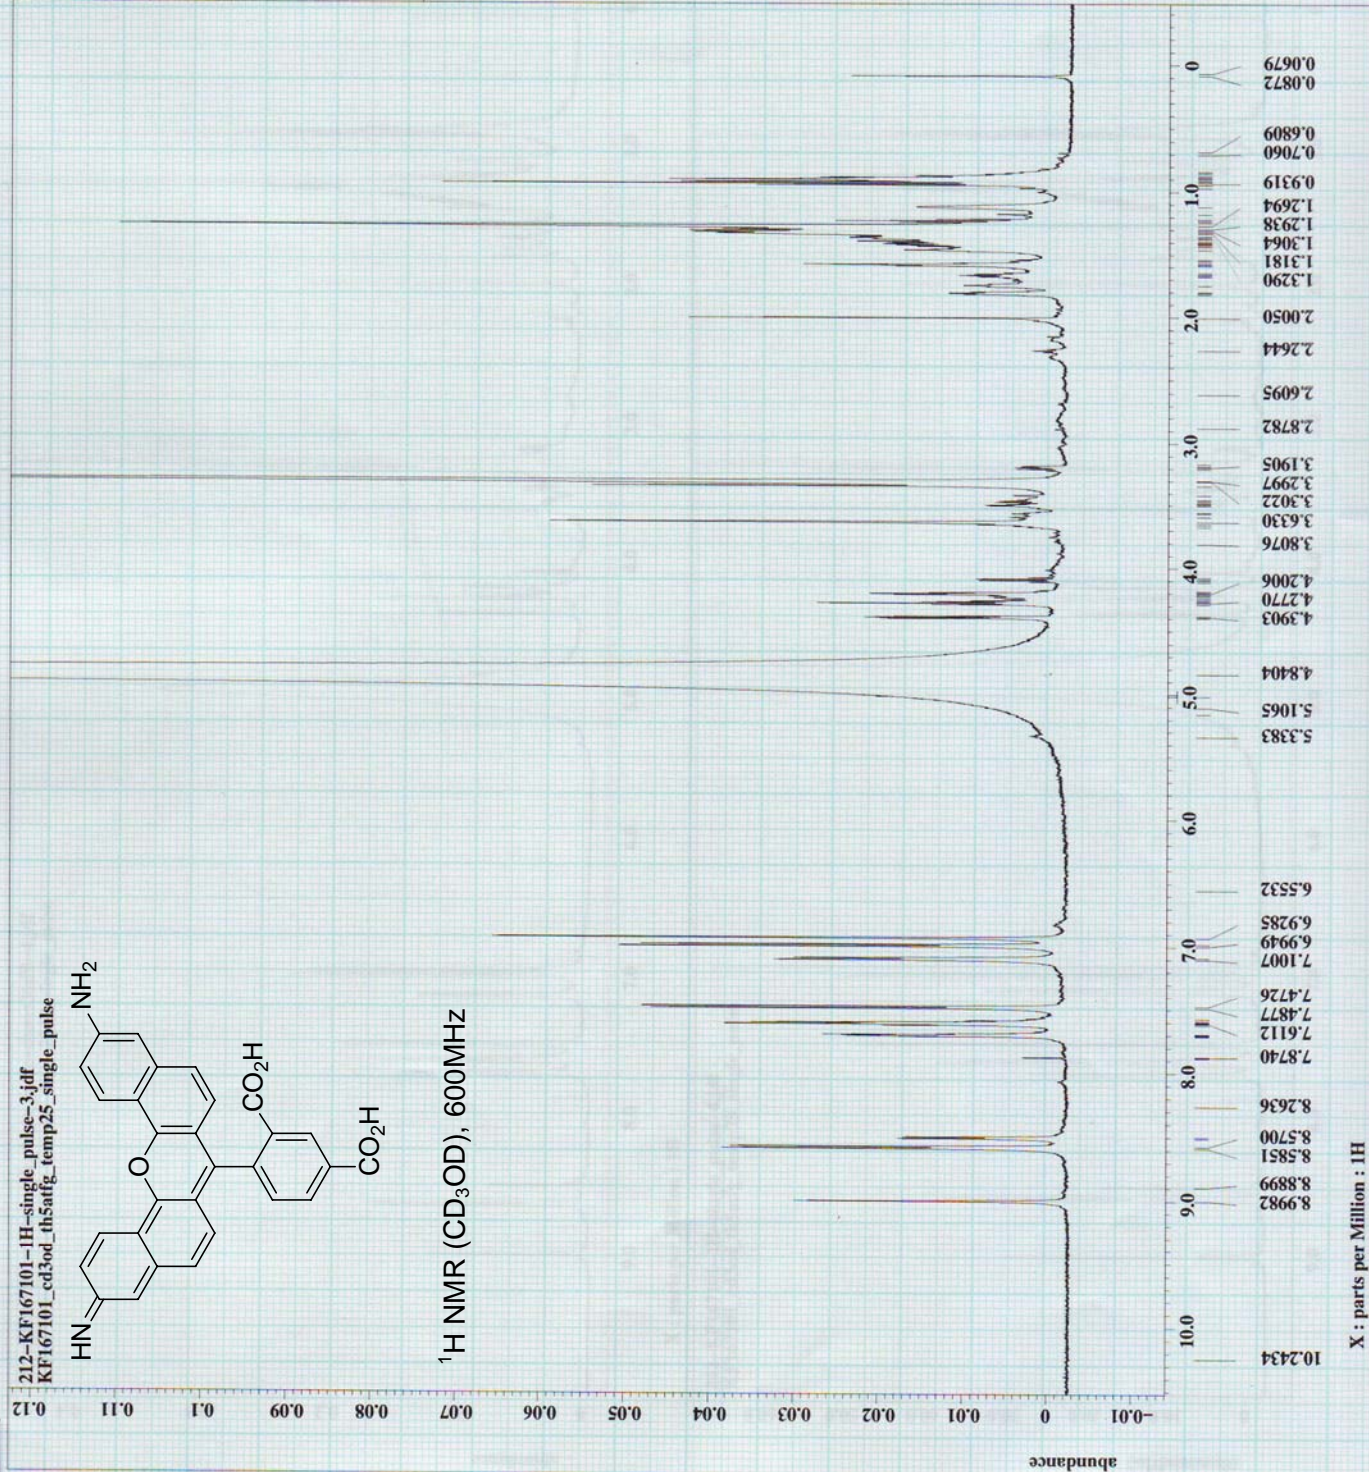

X : parts per Million : 1H



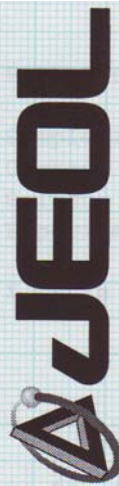

```

    ---- PROCESSING PARAMETERS ----
    dc balance : 0 : FALSE
    secp : 2.0 [Hz] : 0.0 [s]
    trapezoid3 : 0 [%] : 80 [%] : 100 [%]
    zerofill : 1
    fft : 1 : TRUE : TRUE
    ppm
    phase : -177.75 : 195 : 70 [%]
    lbase_correct : FALSE
    reference : 47.685 [ppm] : 49 [ppm]
    Derived from: 212-KF167101-cd3od-13C-sin
    
```

```

    Filename = 212-KF167101-cd3od-13
    Author = hkoshino
    Experiment = single_pulse_dec
    Sample_id = hk
    Solvent = METHANOL-D3
    Creation time = 28-JUN-2008 04:51:12
    Revision time = 30-JUN-2008 10:57:09
    Current_time = 30-JUN-2008 10:57:22
    Content = KF167101-cd3od-th5atf
    Date_format = ID_REAL
    Dim_size = 13107
    Dim_title = 13C
    Dim_units = [ppm]
    Dimensions = X
    Site = ECA600
    Spectrometer = DELTA2_NMR
    Field_strength = 14.09636928 [T] (600 [M
    X_acq_duration = 0.393216 [s]
    X_domain = 13C
    X_freq = 150.91343039 [MHz]
    X_offset = 100 [ppm]
    X_points = 16384
    X_prescans = 4
    X_resolution = 2.54313151 [Hz]
    X_sweep = 41.66666667 [kHz]
    Irr_domain = 1H
    Irr_freq = 600.1723046 [MHz]
    Irr_offset = 5 [ppm]
    Clipped = FALSE
    Mod_return = 1
    Scans = 16000
    Total_scans = 16000
    X_90_width = 9.13 [us]
    X_acq_time = 0.393216 [s]
    X_angle = 45 [deg]
    X_atn = 6 [dB]
    X_pulse = 4.565 [us]
    Irr_atn_dec = 18.8 [dB]
    Irr_atn_noe = 18.8 [dB]
    Irr_noise = WALTZ
    Decoupling = TRUE
    Initial_wait = 1 [s]
    Noe = TRUE
    Noe_time = 1.01 [s]
    Recvr_gain = 60
    Relaxation_delay = 1.01 [s]
    Repetition_time = 1.403216 [s]
    Temp_get = 25 [dC]
    
```

212-KF167101-cd3od-13C-single\_pulse\_dec-15.jdf  
 KF167101-cd3od-th5atfg\_temp25\_single\_pulse decoupled gated NOE

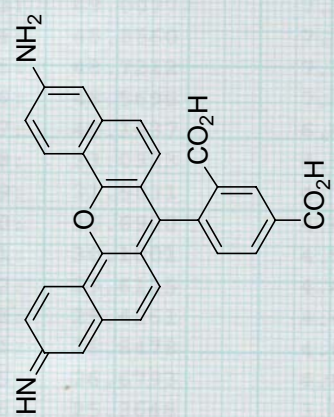

<sup>13</sup>C NMR (CD<sub>3</sub>OD), 150MHz

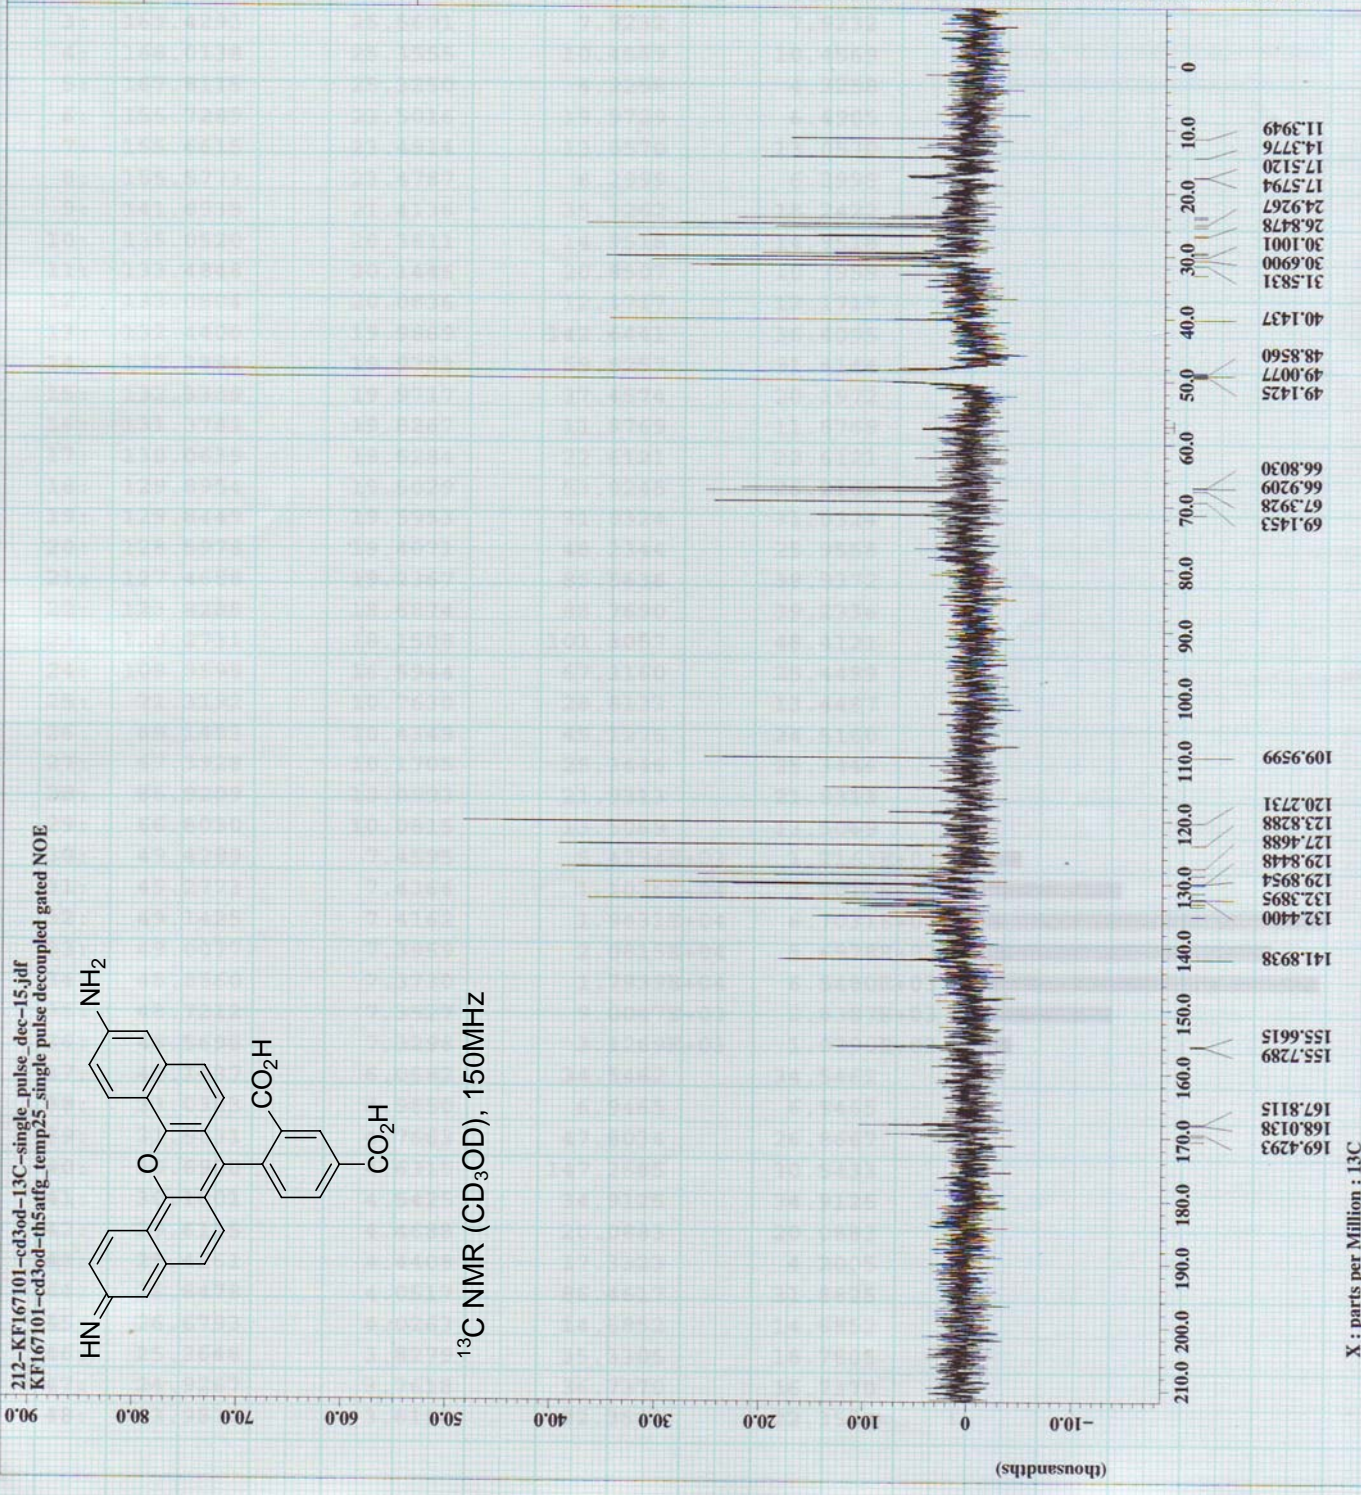

X : parts per Million : 13C



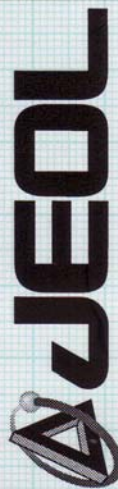

----- PROCESSING PARAMETERS -----  
 gauss 5.0 [Hz] : 0.0 [s]  
 sinbell auto  
 zerofill : 1  
 fft : 1 : TRUE : TRUE  
 ppm  
 [transpose]  
 sinbell4 : -60 : 160  
 trapezoid3 : 5 [%] : 80 [%] : 100 [%]  
 zerofill : 2  
 fft : 1 : TRUE : TRUE  
 ppm  
 abs  
 [transpose]

212-KF167101-cd3od-13C-single\_pulse\_dec-15.jdf

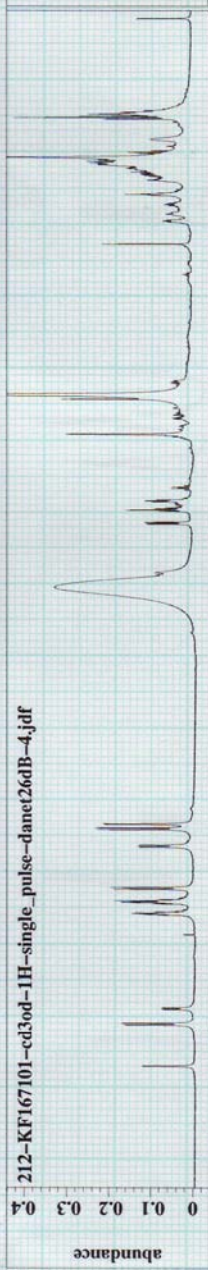

212-KF167101-cd3od-hmbc-pfg-8Hz-2.jdf  
 KF167101-cd3od-th5atfg\_temp25\_gradient enhanced HMBC

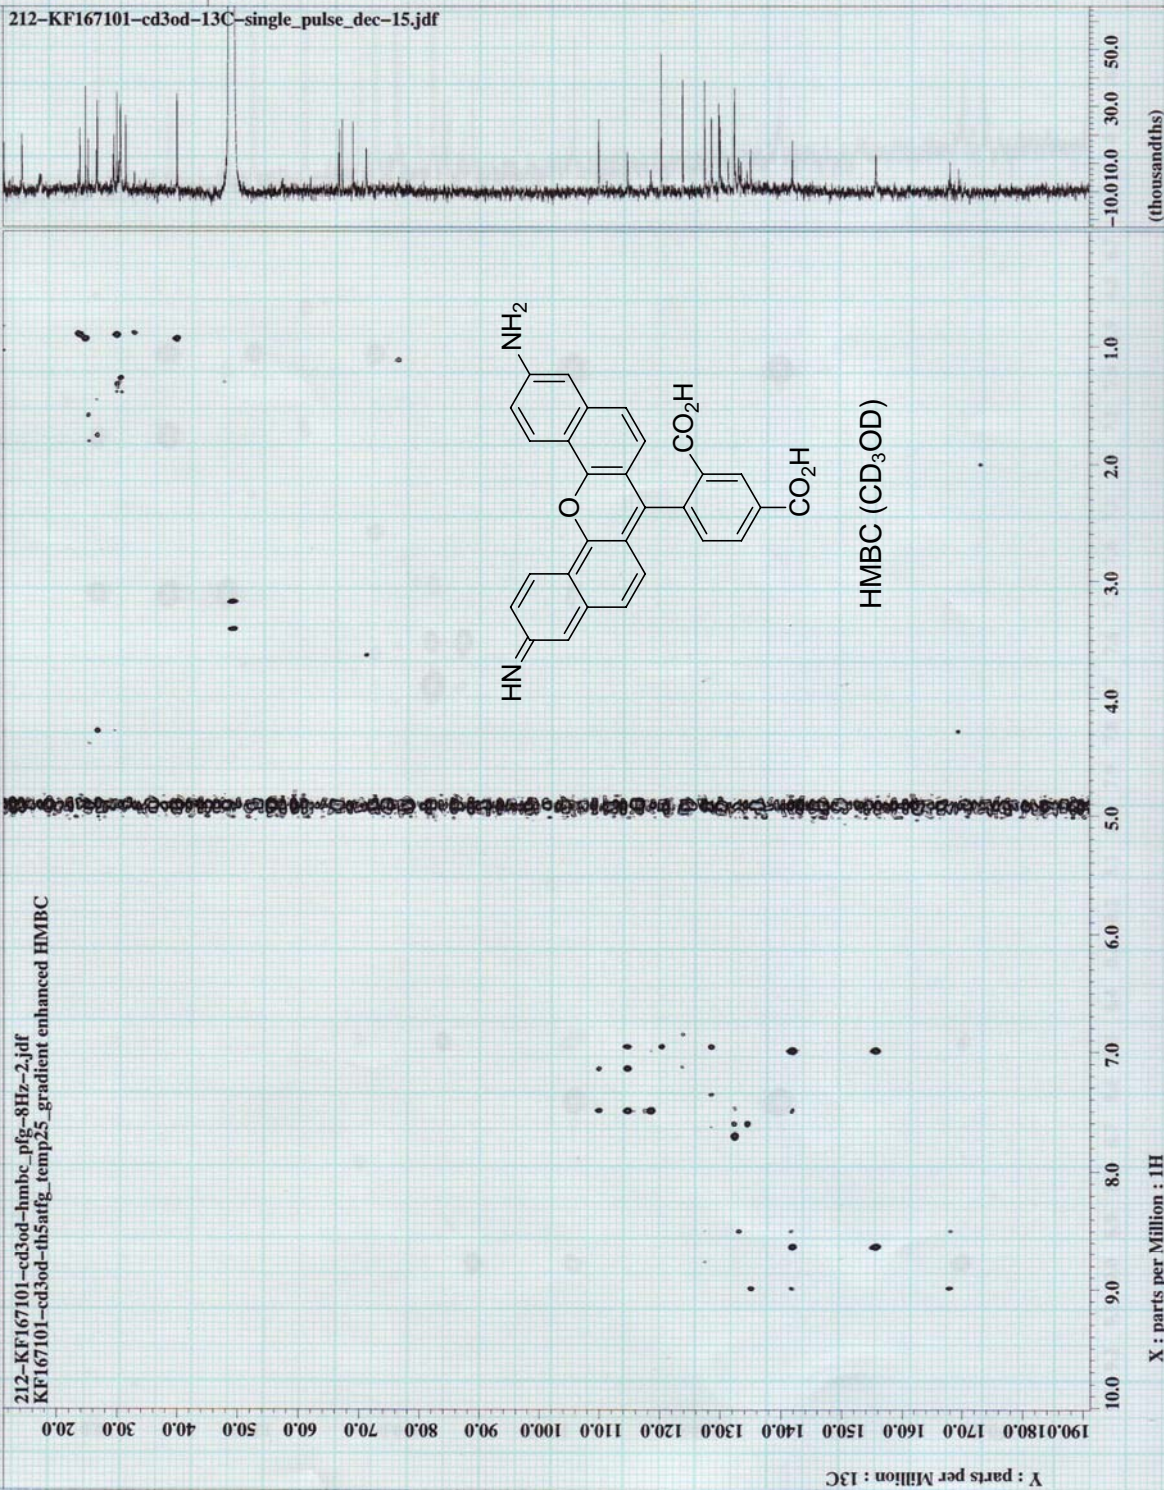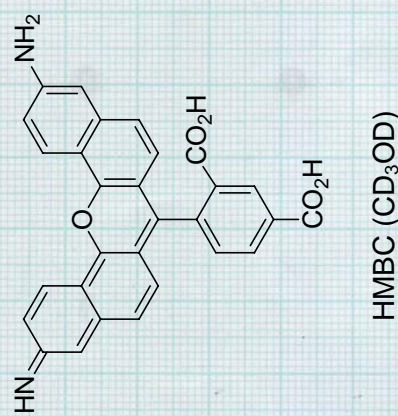

Filename = 212-KF167101-cd3od-hm  
 Author = hkoshino  
 Experiment = hmbc\_pfg.ex2  
 Sample id = hk  
 Solvent = METHANOL-D3  
 Creation time = 29-JUN-2008 02:12:32  
 Revision time = 30-JUN-2008 11:21:55  
 Current time = 30-JUN-2008 11:22:58  
 Content = KF167101-cd3od-th5atf  
 Data format = 2D REAL REAL  
 Dim size = 1638, 1024  
 Dim title = 1H 13C  
 Dim units = [ppm] [ppm]  
 Dimensions = X Y  
 Site = ECA600  
 Spectrometer = DELTA2\_NMR  
 Field strength = 14.09636928 [T] (600 [M  
 X\_acq\_duration = 0.2727936 [s]  
 X\_domain = 1H  
 X\_freq = 600.1723046 [MHz]  
 X\_offset = 5 [ppm]  
 X\_points = 2048  
 X\_prescans = 4  
 X\_resolution = 3.66577515 [Hz]  
 X\_sweep = 7.50750751 [kHz]  
 Y\_domain = 13C  
 Y\_freq = 150.91343039 [MHz]  
 Y\_offset = 100 [ppm]  
 Y\_points = 512  
 Y\_prescans = 0  
 Y\_resolution = 53.07404891 [Hz]  
 Y\_sweep = 27.17391304 [kHz]  
 Tri\_domain = 1H  
 Tri\_freq = 600.1723046 [MHz]  
 Tri\_offset = 5 [ppm]  
 Clipped = FALSE  
 Mod return = 1  
 Scans = 16  
 Total\_scans = 8192  
 X\_acq\_time = 0.2727936 [s]  
 X\_atn = 3.4 [dB]  
 X\_pulse = 13 [us]  
 Y\_acq\_time = 18.8416 [ms]  
 Y\_atn = 6 [dB]  
 Y\_pulse = 9.13 [us]  
 Tri\_mode = Off  
 Dante\_presat = FALSE  
 Delta = 62.5 [ms]  
 Grad 1 = 0.8 [ms]  
 Grad 1\_amp = 30 [%]

212-KF167101-cd3od-1H-single\_pulse-dantc26dB-4.jdf

abundance

Y : parts per Million : 13C

X : parts per Million : 1H

(thousandths)
